# Supplementary material
Source: PubMed Central journal article supplement (PMC2906310)
Supplement: supp_M109.084046_jbc.M109.084046-1.pdf [file supp_M109.084046_jbc.M109.084046-1.pdf]

**supplemental Table S1. Primer sets for construction**

| Application                 | Primer Set  |                                       | Primer Name | Sequence                                     | Construct Name                 |
|-----------------------------|-------------|---------------------------------------|-------------|----------------------------------------------|--------------------------------|
|                             | Primer Name | Sequence                              |             |                                              |                                |
| <i>SYT1</i> pomoter cloning | SYT1p F     | CACCGGATCCGAAAGATCAGGATGGTGAA         | SYT1p R     | GGATCCACTAGTTTGGATTCCGTTTCAGATC              | pENTR <i>SYT1</i> p            |
| SYT1 cloning/Truncates      | TM F        | CACCGTCGACACTAGTATGGGCTTTTTCAGTACG    | TM R        | TACATGCCATGGCGCCGCCACCACCTCCACGATCGAAATCCGG/ | pENTR TM                       |
|                             | TM F        | CACCGTCGACACTAGTATGGGCTTTTTCAGTACG    | SMP R       | TACATGCCATGGCGCCGCCACCACCTCCTCCAACAGGCCTTCTG | pENTR TM-SMP                   |
|                             | TM F        | CACCGTCGACACTAGTATGGGCTTTTTCAGTACG    | C2A R       | CCATGGCGCCGCCACCACCTCCTCAAAGCCTTTGGGCAT      | pENTR TM-SMP-C2A               |
|                             | TM F        | CACCGTCGACACTAGTATGGGCTTTTTCAGTACG    | C2B R       | TACATGCCATGGCGCCGCCACCACCTCCGGCAGTTCGCCACTCC | pENTR SYT1-EmGFP               |
|                             | SMP F       | CACCACTAGTATGGTTGACTGGATAAACAGA       | C2B R       | TACATGCCATGGCGCCGCCACCACCTCCGGCAGTTCGCCACTCC | pENTR SMP-C2A-C2B              |
|                             | C2A F       | CACCACTAGTATGATTGTCCATGTGAAAGTTGT     | C2B R       | TACATGCCATGGCGCCGCCACCACCTCCGGCAGTTCGCCACTCC | pENTR C2A-C2B                  |
|                             | C2B F       | CACCACTAGTATGACGCAAGCCGTGCAGAAAGC     | C2B R       | TACATGCCATGGCGCCGCCACCACCTCCGGCAGTTCGCCACTCC | pENTR C2B                      |
| SYT5 cloning                | SYT5 F      | CACCGTCGACATGGGTTTCATAGTCGGCG         | SYT5 R      | CCATGGCACCTCCTCCACCTCCGGAATCACGATAAAATTGATTG | pENTR SYT5                     |
| SYT1 mutants                | Loop1 F     | ATCTTGAATAGGAATTTACATCCTCAGCCGAATGCAC | Loop1 R     | TTAATGGGTAAAGCTGATTTCCTTACGTGCGCATCTATT      | SYT1 Loop1*/SYT1 Loop1*+Loop3* |
|                             | Loop3 F     | ATGGGTAAAGCTGATCCTTACGTGCGCATCTATT    | Loop3 R     | TAAATCTTGAATAGGAACATCCTCAGCCGAATGCA          | SYT1 Loop3*/SYT1 Loop1*+Loop3* |

**supplemental Table S2.** ATPase activity of plasma membrane fraction isolated with aqueous two-phase partitioning system

| TX100 | ATPase activity (Pi mmol/mg proteins/h) |             | Vanadate sensitive |
|-------|-----------------------------------------|-------------|--------------------|
|       | Vanadate                                |             |                    |
|       | -                                       | +           |                    |
| -     | 3.29 ± 0.05                             | 0.83 ± 0.03 | 2.46               |
| +     | 15.28 ± 0.11                            | 4.75 ± 0.08 | 10.53              |

**supplemental Table S3.** *Syt* genes in angiosperms used in the phylogenetic analysis.

| Classification              | Species                    | Gene name        | Accession number/Gene ID           |
|-----------------------------|----------------------------|------------------|------------------------------------|
| monocots                    | <i>Oryza sativa</i>        | <i>OsSyt1/2a</i> | Os09g0538800                       |
|                             |                            | <i>OsSyt1/2b</i> | Os02g0448400                       |
|                             |                            | <i>OsSyt3</i>    | Os06g0685300                       |
|                             |                            | <i>OsSyt4/5</i>  | Os08g0300200                       |
|                             | <i>Sorghum bicolor</i>     | <i>SbSyt1/2a</i> | estExt_fgenesh1_pm.C_chr_10622     |
|                             |                            | <i>SbSyt1/2b</i> | estExt_Genewise1.C_chr_28638       |
|                             |                            | <i>SbSyt3</i>    | MOL_fgenesh1_pm.C_chr_10000423     |
|                             |                            | <i>SbSyt4/5</i>  | MOL_e_gw1.2.19906.1                |
|                             |                            | <i>SbSyt5</i>    | estExt_Genewise1.C_chr_68072       |
|                             |                            | eudicots         | <i>Vitis vinifera</i>              |
| <i>VvSyt2</i>               | GSVIVT00014388001          |                  |                                    |
| <i>VvSyt3a</i>              | GSVIVT00018176001          |                  |                                    |
| <i>VvSyt3b</i>              | GSVIVT00023206001          |                  |                                    |
| <i>VvSyt4</i>               | GSVIVT00032686001          |                  |                                    |
| <i>VvSyt5</i>               | GSVIVT00006418001          |                  |                                    |
| <i>Medicago truncatula</i>  | <i>MtSyt1</i>              |                  | AC121235_39                        |
|                             | <i>MtSyt2</i>              |                  | AC149634_14                        |
|                             | <i>MtSyt4</i>              |                  | AC148405_51                        |
|                             | <i>MtSyt5</i>              |                  | AC144657_3                         |
|                             | <i>Populus trichocarpa</i> |                  | <i>PtSyt1a</i>                     |
| <i>PtSyt1b</i>              |                            |                  | MOL_estExt_fgenesh4_pg.C_LG_IX0330 |
| <i>PtSyt2a</i>              |                            |                  | MOL_grail3.0002070502              |
| <i>PtSyt2b</i>              |                            |                  | MOL_estExt_fgenesh4_pg.C_LG_II0188 |
| <i>PtSyt3a</i>              |                            |                  | fgenesh4_pm.C_LG_VIII000119        |
| <i>PtSyt3b</i>              |                            |                  | fgenesh4_pg.C_LG_X002040           |
| <i>PtSyt4</i>               |                            |                  | MOL_gw1.XVIII.1683.1               |
| <i>PtSyt5a</i>              |                            |                  | MOL_MOL_MOL_gw1.XVIII.34.1         |
| <i>PtSyt5b</i>              |                            |                  | MOL_estExt_fgenesh4_pm.C_1520033   |
| <i>Arabidopsis thaliana</i> | <i>AtSyt1</i>              |                  | At2g20990                          |
|                             | <i>AtSyt2</i>              |                  | At1g20080                          |
|                             | <i>AtSyt4</i>              |                  | At5g11100                          |
|                             | <i>AtSyt5</i>              |                  | At1g05500                          |
|                             | <i>Carica papaya</i>       |                  | <i>CpSyt1</i>                      |
| <i>CpSyt2</i>               |                            |                  | EVM_prediction_supercontig_26.308  |
| <i>CpSyt4</i>               |                            |                  | EVM_prediction_supercontig_217.23  |
| <i>CpSyt5</i>               |                            |                  | EVM_prediction_supercontig_46.58   |

## supplemental Fig. S1

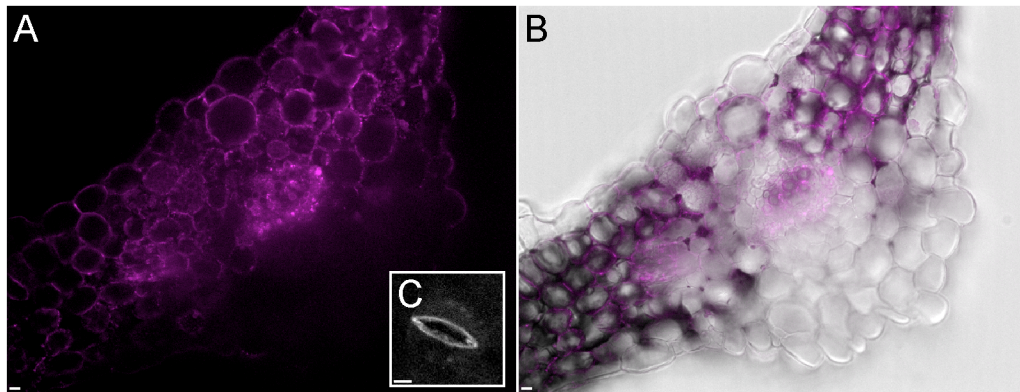

Supplemental Fig. S1. Localization of SYT1-EmGFP in leaf cells. (A, B) Cross-section of living leaf prepared from SYT1-EmGFP expressing plant was observed with confocal fluorescent microscopy. EmGFP emission is pseudo-colored purple (A). Bright field image was merged with EmGFP emission (B). EmGFP emission in the stomata of leaves was also observed (C). Bars indicate 10  $\mu\text{m}$ .

## supplemental Fig. S2

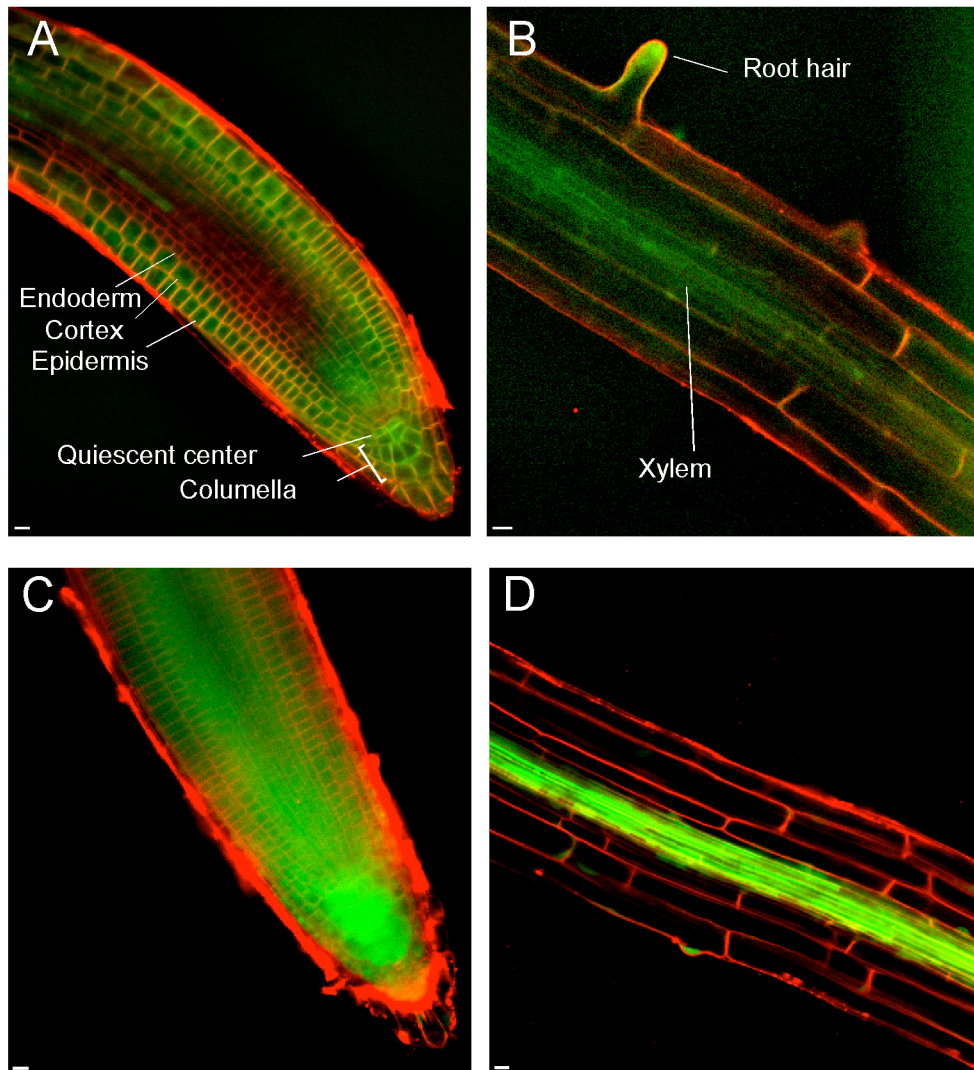

Supplemental Fig. S2. Localization of EmGFP-SYT1 and EmGFP in root cells. Emission of EmGFP (green) and FM4-64 (red) in root cells was observed in transgenic plants expressing SYT1-EmGFP and EmGFP. Fluorescence images of SYT1-EmGFP in the root tip (A) and elongation/differentiation zone (B). Fluorescence images of EmGFP in the root tip (C) and differentiation zone (D). These results of the GFP expression pattern were similar to those of GUS driven by the SYT1 native promoter (Schanpire et al., 2008). Bars indicate 10  $\mu$ m.

### supplemental Fig. S3

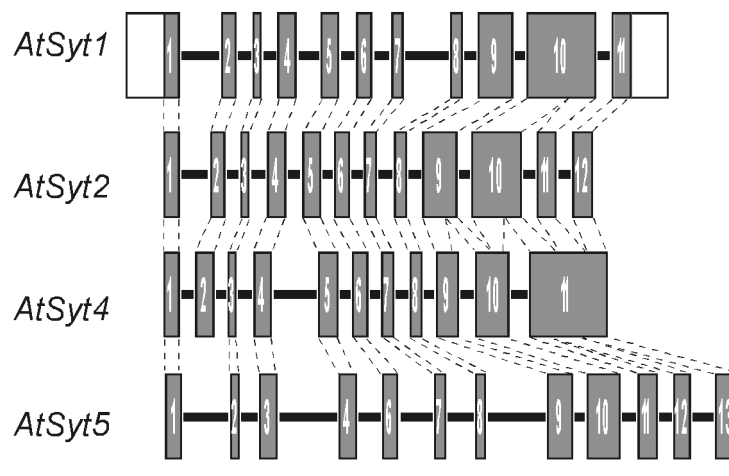

Supplemental Fig. S3. Gene structures of *Arabidopsis* Syt genes. The genomic sequences of *AtSyt*s were obtained from TAIR database, and their exon-intron structures were compared. Exon-intron structures were highly conserved among the *AtSyt* genes, with the exon-intron structures from the 1st to the 8th exon being shared by all *AtSyt* genes, except for *AtSyt5*, which lacks the 2nd exon. These results suggest that plant synaptotagmin proteins share a common ancestral gene that existed before the differentiation of eudicots and monocots. The boxes denote exons; the coding regions are shaded gray; and the lines between the boxes represent the introns of each gene. The number in the box indicates the exon number. The conserved regions are connected by dashed lines. Bar, 500 bp.

# supplemental Fig. S4

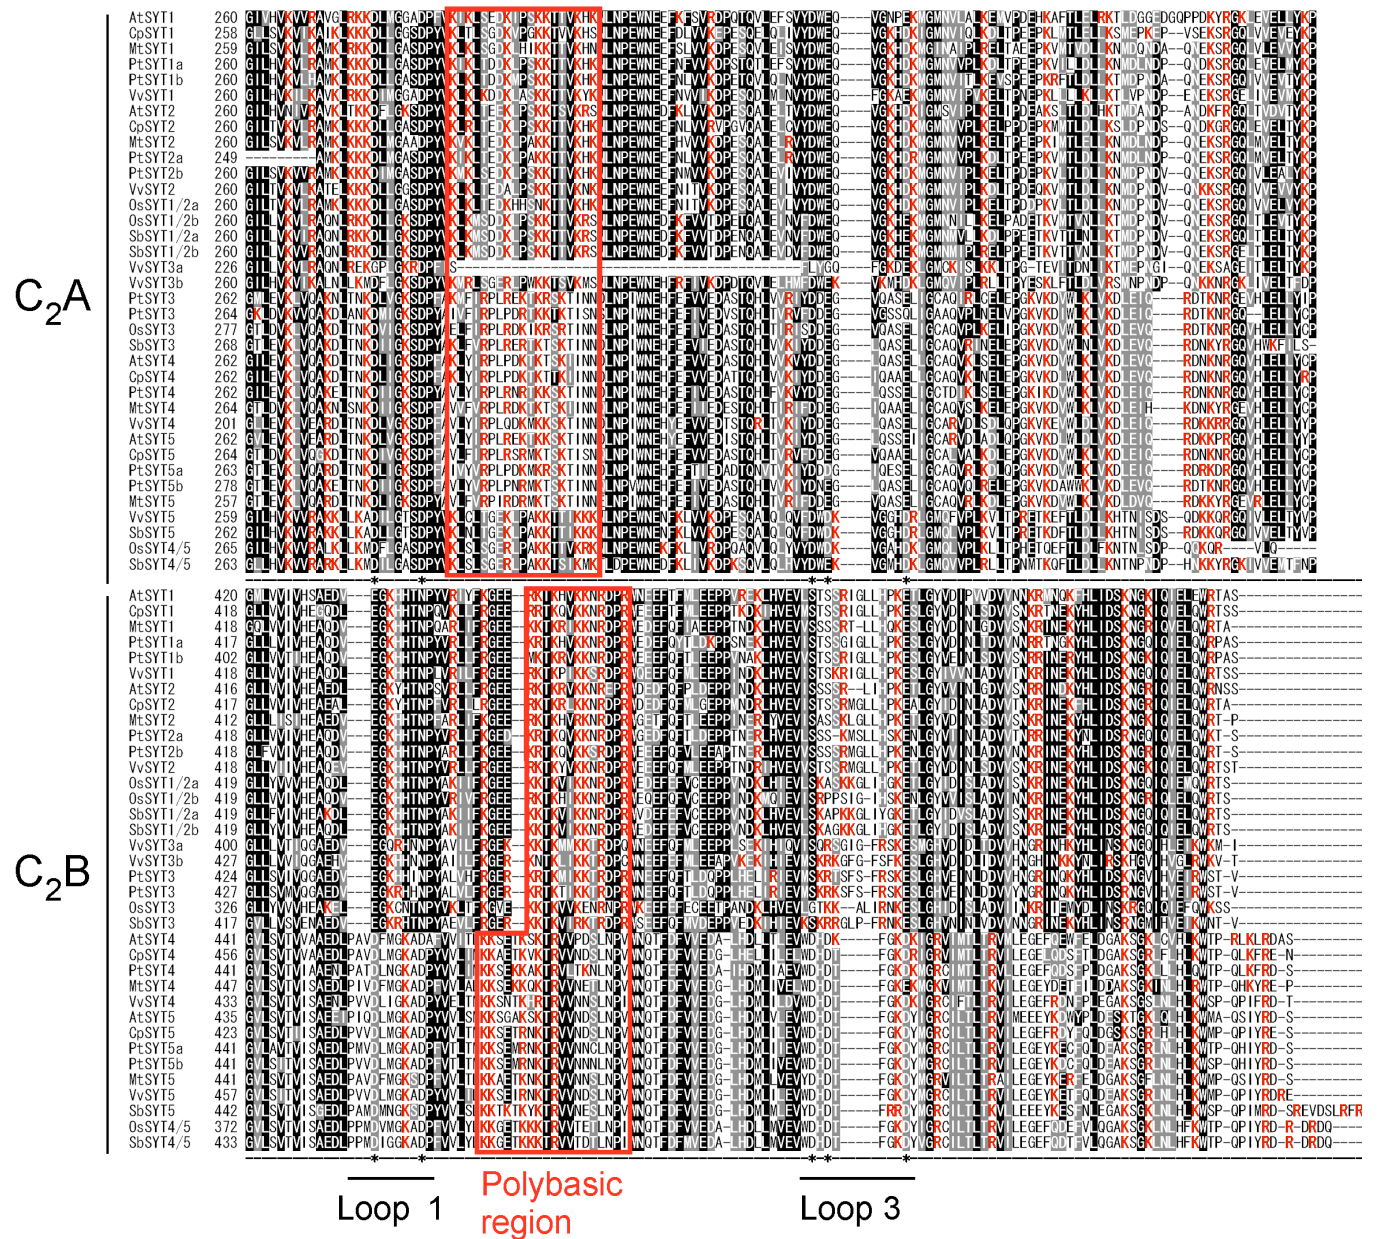

Supplemental Fig. S4. Multiple alignment of C<sub>2</sub>A and C<sub>2</sub>B domains in plants. The amino acid sequences of the C<sub>2</sub>A and C<sub>2</sub>B domains in plants were aligned using ClustalW. The names of these genes are presented in supplemental Table S3. Acidic amino acid residues are shown in red. The polybasic region is indicated with red open boxes. Asterisks indicate the amino acid residues of the conserved calcium binding motifs (Loop1 and Loop3) in the C2 domains.

supplemental Fig. S5

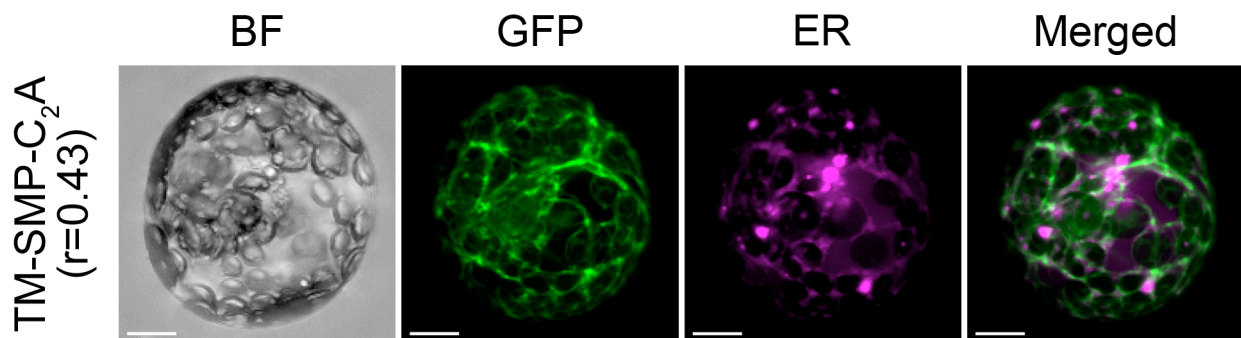

Supplemental Fig. S5. Localization of transiently expressed TM-SMP-C<sub>2</sub>A in protoplasts stained with ER-Tracker. Projection images generated from optical sections of EmGFP fluorescence and ER-Tracker in protoplasts expressing the truncated SYT1-EmGFP protein. Emissions of EmGFP and ER-Tracker were observed using a confocal fluorescence microscope. The obtained fluorescence images of each optical section were reconstructed as projection images. TM-SMP-C<sub>2</sub>A: TM with SMP and C<sub>2</sub>A domains. BF, bright field; GFP, GFP fluorescence; ER, fluorescence of ER-Tracker; Merged, merged image of GFP with ER-Tracker. Fluorescence of GFP, and ER-Tracker were pseudocolored into green and magenta, respectively. Bars indicate 10  $\mu$ m.
